# Supplementary material for: Controlled synthesis of Zn(1−1.5x)FexS nanoparticles via a microwave route and their photocatalytic properties
Source: Royal Society of Chemistry journal article supplement (doi:10.1039/c5ra20314g), 2015-01-01
Supplement: c5ra20314g1.pdf [file c5ra20314g1.pdf]

## Supporting Information for

# Controlled synthesis of the $\text{Zn}_{(1-1.5x)}\text{Fe}_x\text{S}$ nanoparticles via microwave route and their photocatalytic properties

Jing Zhang,<sup>a</sup> Weijie Zhao,<sup>\*a</sup> Guangshan Zhang,<sup>\*b</sup> Limin Xi,<sup>a</sup> Hangui Wu<sup>a</sup> and Zhikui Hao<sup>a</sup>

<sup>a</sup>*School of Biological and Chemical Engineering, Taizhou Vocational & Technical College,  
Taizhou 318000, PR China*

<sup>b</sup>*School of Municipal and Environmental Engineering, Harbin Institute of Technology,  
Harbin 150090, PR China*

**Table S1**Precursor amounts of the  $\text{Zn}_{(1-1.5x)}\text{Fe}_x\text{S}$  catalysts synthesized at different  $x$  values.

| Value of $x$ | $\text{Zn}(\text{NO}_3)_2 \cdot 6\text{H}_2\text{O}$ (mmol) | $\text{Fe}(\text{NO}_3)_3 \cdot 9\text{H}_2\text{O}$ (mmol) |
|--------------|-------------------------------------------------------------|-------------------------------------------------------------|
| 0            | 0                                                           | 10.00                                                       |
| 0.006        | 0.060                                                       | 9.94                                                        |
| 0.01         | 0.10                                                        | 9.90                                                        |
| 0.02         | 0.20                                                        | 9.80                                                        |
| 0.03         | 0.30                                                        | 9.70                                                        |
